# Supplementary material for: Psychometric Validation of the KDQoL-36 in Dialysis Using Item Response Theory and Computer Adaptive Testing
Source: Research Square preprint supplement (doi:10.21203/rs.3.rs-7751098/v1), 2025-10-22
Supplement: Supplementary file 1 [file 821cf6dac0d02ceed34e79d1.docx]

**Figures**

***Table 1: Baseline characteristics of the study population (N = 8,325).***

| **Characteristics** | **Mean (SD) or N (%)** |
| --- | --- |
|  | **N = 8325** |
| **Age** | *68.1 (14.2)* |
| **Female** | *5278 (63.4)* |
| **Ethnicity** |  |
| Caucasian | *4455 (53.5)* |
| Missing | *3603 (43.3)* |
| Other | *267 (3.2)* |
| **Vintage > 1 year** | *6840 (82.2)* |
| **Etiology** |  |
| *Diabetes* | *1375 (16.5)* |
| *Hypertension* | *940 (11.3)* |
| *Glomerulonephritis* | *790 (9.5)* |
| *Polycystic Kidney Disease* | *487 (5.8)* |
| *Tubulointerstitial nephritis and related renal tubulointerstitial disorders* | *414 (5.0)* |
| *Missing/Unknown/Other causes* | *4319 (51.9)* |
| **Tobacco Use** |  |
| Missing | *4697 (56.4)* |
| current/past smoker | *1549 (18.6)* |
| non smoker | *2079 (25.0)* |
| ***BMI*** | *26.96 (6.10)* |
| ***Charlson Index Score*** | *3.81 (1.94)* |
| ***Dialysis Modality*** |  |
| *HD* | *2931 (36.4)* |
| *HDF* | *5125 (63.6)* |
| ***Vascular Access*** |  |
| *Fistula* | *5328 (66.1)* |
| *Catheter* | *2521 (31.3)* |
| *Graft or other* | *476 (5.7)* |
|  | |
| ***Hemoglobin*** | *11.34 (1.32)* |
| ***Calcium*** | *9.01 (0.66)* |
| ***Phosphate*** | *4.49 (1.42)* |
| ***Albumin*** | *3.80 (0.75)* |
| ***iPTH*** | *322.6 (315.5)* |
| ***Kt/V*** | *1.72 (0.41)* |
|  | |
| ***Diabetes*** | *3024 (37.5)* |
| ***Hypertension*** | *4194 (52.0)* |
| ***Congestive Heart Failure*** | *2111 (26.2)* |
| ***Chronic Obstructive Pulmonary Disease*** | *427 (5.3)* |
| ***Peripheral Vascular Disease*** | *1462 (18.1)* |
| ***Cerebro-vascular Disease*** | *916 (11.4)* |
| ***Cancer (%)*** | *1140 (14.1)* |
|  | |
| ***Burden*** | *43.8 (26.3)* |
| ***Effect*** | *69.7 (20.9)* |
| ***Symptom*** | *79.8 (15.0)* |
| ***Physical Health Composite*** | *38.0 (10.1)* |
| ***Mental Health Composite*** | *46.5 (10.6)* |

***Table 1: Baseline characteristics of the study population (N = 8,325).****Values are presented as mean (SD) for continuous variables and as n (%) for categorical variables.**BMI – Body Mass Index; Catheter – Central Venous Catheter; Charlson Index Score – Charlson Comorbidity Index Score; Fistula – Arteriovenous Fistula; HDF – Hemodiafiltration; Kt/V dialysis adequacy; PTH – Parathyroid Hormo*

***Table 2A: Multi-trait matrix of SF12 questionare: Item convergent and divergent validity***

| **Dimension** | **Inter-item correlation coefficients** | | | | | | | | | | | | | **Item-subscale correlation coefficients** | |
| --- | --- | --- | --- | --- | --- | --- | --- | --- | --- | --- | --- | --- | --- | --- | --- |
| **Items** | **SF12PHC** | | | | | | **SF12MHC** | | | | | |
| **SF12PHC** | **SF12-1** | **SF12-2** | **SF12-3** | **SF12-4** | **SF12-5** | **SF12-8** | **SF12-6** | **SF12-7** | **SF12-9** | **SF12-10** | **SF12-11** | **SF12-12** | **SF12PHC** | **SF12MHC** |
| **SF12-1** | - | - | - | - | - | - | - | - | - | - | - | - | 0.66 | 0.43 |
| **SF12-2** | 0.33 | - | - | - | - | - | - | - | - | - | - | - | 0.73 | 0.42 |
| **SF12-3** | 0.32 | 0.59 | - | - | - | - | - | - | - | - | - | - | 0.72 | 0.40 |
| **SF12-4** | 0.28 | 0.39 | 0.37 | - | - | - | - | - | - | - | - | - | 0.62 | 0.43 |
| **SF12-5** | 0.29 | 0.42 | 0.41 | 0.59 | - | - | - | - | - | - | - | - | 0.65 | 0.44 |
| **SF12-8** | 0.27 | 0.31 | 0.28 | 0.48 | 0.47 | - | - | - | - | - | - | - | 0.48 | 0.58 |
| **SF12MHC** | **SF12-6** | 0.16 | 0.24 | 0.25 | 0.31 | 0.35 | 0.37 | - | - | - | - | - | - | 0.35 | 0.42 |
| **SF12-7** | 0.35 | 0.39 | 0.39 | 0.35 | 0.38 | 0.34 | 0.26 | - | - | - | - | - | 0.76 | 0.52 |
| **SF12-9** | 0.30 | 0.21 | 0.21 | 0.21 | 0.23 | 0.30 | 0.20 | 0.36 | - | - | - | - | 0.39 | 0.74 |
| **SF12-10** | 0.40 | 0.35 | 0.36 | 0.30 | 0.32 | 0.27 | 0.19 | 0.39 | 0.43 | - | - | - | 0.52 | 0.68 |
| **SF12-11** | 0.28 | 0.25 | 0.23 | 0.27 | 0.26 | 0.43 | 0.22 | 0.32 | 0.42 | 0.28 | - | - | 0.39 | 0.75 |
| **SF12-12** | 0.26 | 0.34 | 0.30 | 0.34 | 0.33 | 0.38 | 0.25 | 0.39 | 0.31 | 0.29 | 0.48 | - | 0.47 | 0.70 |

***Table 2A: Multi-trait matrix of SF12 questionare: Item convergent and divergent validity****Inter-item and item–subscale Pearson’s correlation coefficients for the Physical Health Composite (***SF12PHC***) and Mental Health Composite Score (***SF12MHC***) dimensions. Values above the diagonal represent inter-item correlations, while the last two columns show item-total correlations with* **SF12PHC** *and* **SF12MHC***, respectively.*

***Table 2B: Multi-trait analysis of of KDQoL-36 disease specific scales questionare :Item convergent and divergent validity***

| ***Inter-item correlation coefficients*** | | | | | | | | | | | | | | | | | | | | | | | | | | | | | |
| --- | --- | --- | --- | --- | --- | --- | --- | --- | --- | --- | --- | --- | --- | --- | --- | --- | --- | --- | --- | --- | --- | --- | --- | --- | --- | --- | --- | --- | --- |
| **DIMENSION** | | ***KDQoL-36BKD*** | | | | ***KDQoL-36SKD*** | | | | | | | | | | | | ***KDQoL-36EKD*** | | | | | | | | ***Item-subscale correlation coefficients*** | | | |
| **ITEM** | | ***I13*** | ***I14*** | ***I15*** | ***I16*** | ***I17*** | ***I18*** | ***I19*** | ***I20*** | ***I21*** | ***I22*** | ***I23*** | ***I24*** | ***I25*** | ***I26*** | ***I27*** | ***I28*** | ***I29*** | ***I30*** | ***I31*** | ***I32*** | ***I33*** | ***I34*** | ***I35*** | ***I36*** | ***BKD*** | ***SKD*** | ***EKD*** | ***α*** |
| ***KDQoL-36BKD*** | ***I13*** | **-** | **-** | **-** | **-** | **-** | **-** | **-** | **-** | **-** | **-** | **-** | **-** | **-** | **-** | **-** | **-** | **-** | **-** | **-** | **-** | **-** | **-** | **-** | **-** | 0.79 | 0.32 | 0.44 | *0.89* |
| ***I14*** | *0.62* | **-** | **-** | **-** | **-** | **-** | **-** | **-** | **-** | **-** | **-** | **-** | **-** | **-** | **-** | **-** | **-** | **-** | **-** | **-** | **-** | **-** | **-** | **-** | 0.80 | 0.31 | 0.43 | *0.89* |
| ***I15*** | *0.55* | *0.57* | **-** | **-** | **-** | **-** | **-** | **-** | **-** | **-** | **-** | **-** | **-** | **-** | **-** | **-** | **-** | **-** | **-** | **-** | **-** | **-** | **-** | **-** | 0.83 | 0.35 | 0.46 | *0.88* |
| ***I16*** | *0.37* | *0.35* | *0.48* | **-** | **-** | **-** | **-** | **-** | **-** | **-** | **-** | **-** | **-** | **-** | **-** | **-** | **-** | **-** | **-** | **-** | **-** | **-** | **-** | **-** | 0.72 | 0.38 | 0.44 | *0.89* |
| ***KDQoL-36SKD*** | ***I17*** | *0.23* | *0.22* | *0.24* | *0.24* | **-** | **-** | **-** | **-** | **-** | **-** | **-** | **-** | **-** | **-** | **-** | **-** | **-** | **-** | **-** | **-** | **-** | **-** | **-** | **-** | 0.30 | 0.61 | 0.37 | *0.89* |
| ***I18*** | *0.12* | *0.12* | *0.17* | *0.21* | *0.27* | **-** | **-** | **-** | **-** | **-** | **-** | **-** | **-** | **-** | **-** | **-** | **-** | **-** | **-** | **-** | **-** | **-** | **-** | **-** | 0.20 | 0.51 | 0.28 | *0.89* |
| ***I19*** | *0.14* | *0.16* | *0.17* | *0.17* | *0.31* | *0.25* | **-** | **-** | **-** | **-** | **-** | **-** | **-** | **-** | **-** | **-** | **-** | **-** | **-** | **-** | **-** | **-** | **-** | **-** | 0.20 | 0.56 | 0.27 | *0.89* |
| ***I20*** | *0.16* | *0.16* | *0.17* | *0.18* | *0.24* | *0.21* | *0.26* | **-** | **-** | **-** | **-** | **-** | **-** | **-** | **-** | **-** | **-** | **-** | **-** | **-** | **-** | **-** | **-** | **-** | 0.21 | 0.57 | 0.29 | *0.89* |
| ***I21*** | *0.20* | *0.18* | *0.17* | *0.20* | *0.29* | *0.19* | *0.26* | *0.49* | **-** | **-** | **-** | **-** | **-** | **-** | **-** | **-** | **-** | **-** | **-** | **-** | **-** | **-** | **-** | **-** | 0.24 | 0.61 | 0.35 | *0.89* |
| ***I22*** | *0.19* | *0.18* | *0.20* | *0.24* | *0.30* | *0.39* | *0.31* | *0.28* | *0.27* | **-** | **-** | **-** | **-** | **-** | **-** | **-** | **-** | **-** | **-** | **-** | **-** | **-** | **-** | **-** | 0.26 | 0.63 | 0.35 | *0.89* |
| ***I23*** | *0.21* | *0.19* | *0.26* | *0.22* | *0.30* | *0.30* | *0.27* | *0.25* | *0.28* | *0.37* | **-** | **-** | **-** | **-** | **-** | **-** | **-** | **-** | **-** | **-** | **-** | **-** | **-** | **-** | 0.28 | 0.61 | 0.37 | *0.89* |
| ***I24*** | *0.17* | *0.14* | *0.19* | *0.24* | *0.22* | *0.20* | *0.15* | *0.20* | *0.24* | *0.26* | *0.28* | **-** | **-** | **-** | **-** | **-** | **-** | **-** | **-** | **-** | **-** | **-** | **-** | **-** | 0.24 | 0.53 | 0.30 | *0.89* |
| ***I25*** | *0.32* | *0.30* | *0.33* | *0.34* | *0.41* | *0.27* | *0.31* | *0.29* | *0.35* | *0.42* | *0.42* | *0.39* | **-** | **-** | **-** | **-** | **-** | **-** | **-** | **-** | **-** | **-** | **-** | **-** | 0.41 | 0.70 | 0.51 | *0.88* |
| ***I26*** | *0.18* | *0.16* | *0.18* | *0.22* | *0.39* | *0.26* | *0.31* | *0.28* | *0.32* | *0.31* | *0.33* | *0.24* | *0.36* | **-** | **-** | **-** | **-** | **-** | **-** | **-** | **-** | **-** | **-** | **-** | 0.24 | 0.62 | 0.33 | *0.89* |
| ***I27*** | *0.17* | *0.17* | *0.20* | *0.23* | *0.26* | *0.29* | *0.25* | *0.25* | *0.26* | *0.32* | *0.35* | *0.36* | *0.36* | *0.30* | **-** | **-** | **-** | **-** | **-** | **-** | **-** | **-** | **-** | **-** | 0.25 | 0.59 | 0.37 | *0.89* |
| ***I28*** | *0.12* | *0.12* | *0.15* | *0.14* | *0.16* | *0.19* | *0.17* | *0.15* | *0.15* | *0.17* | *0.18* | *0.14* | *0.18* | *0.19* | *0.19* | **-** | **-** | **-** | **-** | **-** | **-** | **-** | **-** | **-** | 0.17 | 0.39 | 0.26 | *0.89* |
| ***KDQoL-36EKD*** | ***I29*** | *0.26* | *0.23* | *0.24* | *0.19* | *0.19* | *0.13* | *0.16* | *0.17* | *0.20* | *0.19* | *0.20* | *0.10* | *0.24* | *0.18* | *0.18* | *0.13* | **-** | **-** | **-** | **-** | **-** | **-** | **-** | **-** | 0.29 | 0.30 | 0.61 | *0.89* |
| ***I30*** | *0.23* | *0.22* | *0.24* | *0.23* | *0.19* | *0.16* | *0.16* | *0.18* | *0.17* | *0.17* | *0.21* | *0.15* | *0.26* | *0.19* | *0.21* | *0.15* | *0.54* | **-** | **-** | **-** | **-** | **-** | **-** | **-** | 0.30 | 0.32 | 0.62 | *0.89* |
| ***I31*** | *0.33* | *0.30* | *0.33* | *0.39* | *0.37* | *0.24* | *0.22* | *0.24* | *0.32* | *0.32* | *0.31* | *0.29* | *0.50* | *0.30* | *0.28* | *0.18* | *0.27* | *0.31* | **-** | **-** | **-** | **-** | **-** | **-** | 0.43 | 0.52 | 0.67 | *0.88* |
| ***I32*** | *0.34* | *0.34* | *0.28* | *0.26* | *0.23* | *0.13* | *0.16* | *0.17* | *0.22* | *0.21* | *0.21* | *0.16* | *0.34* | *0.20* | *0.21* | *0.15* | *0.29* | *0.28* | *0.45* | **-** | **-** | **-** | **-** | **-** | 0.39 | 0.35 | 0.69 | *0.89* |
| ***I33*** | *0.25* | *0.27* | *0.30* | *0.31* | *0.24* | *0.22* | *0.19* | *0.21* | *0.23* | *0.27* | *0.24* | *0.23* | *0.34* | *0.21* | *0.28* | *0.18* | *0.27* | *0.31* | *0.38* | *0.37* | **-** | **-** | **-** | **-** | 0.36 | 0.41 | 0.65 | *0.88* |
| ***I34*** | *0.39* | *0.38* | *0.47* | *0.40* | *0.32* | *0.24* | *0.25* | *0.23* | *0.28* | *0.26* | *0.31* | *0.26* | *0.43* | *0.26* | *0.30* | *0.23* | *0.33* | *0.36* | *0.43* | *0.39* | *0.46* | **-** | **-** | **-** | 0.53 | 0.48 | 0.71 | *0.88* |
| ***I35*** | *0.21* | *0.19* | *0.22* | *0.22* | *0.16* | *0.15* | *0.11* | *0.13* | *0.16* | *0.15* | *0.20* | *0.13* | *0.23* | *0.16* | *0.17* | *0.16* | *0.19* | *0.20* | *0.29* | *0.32* | *0.26* | *0.30* | **-** | **-** | 0.27 | 0.27 | 0.58 | *0.89* |
| ***I36*** | *0.26* | *0.27* | *0.31* | *0.32* | *0.23* | *0.21* | *0.17* | *0.18* | *0.23* | *0.23* | *0.27* | *0.23* | *0.33* | *0.21* | *0.29* | *0.21* | *0.27* | *0.29* | *0.37* | *0.37* | *0.35* | *0.46* | *0.39* | **-***-* | 0.37 | 0.40 | 0.66 | *0.88* |

***Table 2B: Multi-trait analysis of of KDQoL-36 disease specific scales questionare: Item convergent and divergent validity***

*Inter-item Pearson’s correlation coefficients and item–subscale correlation coefficients for the Burden Kidney Disease (BKD) (I13–I16), Symptom Kidney Disease (I17–I28), and Effect Kidney Disease (I29–I36) dimensions. The table presents inter-item correlations among all items, correlations of each item with its respective dimension (BKD, SKD, EKD), and Cronbach’s α (α) values indicating internal consistency reliability.*

**
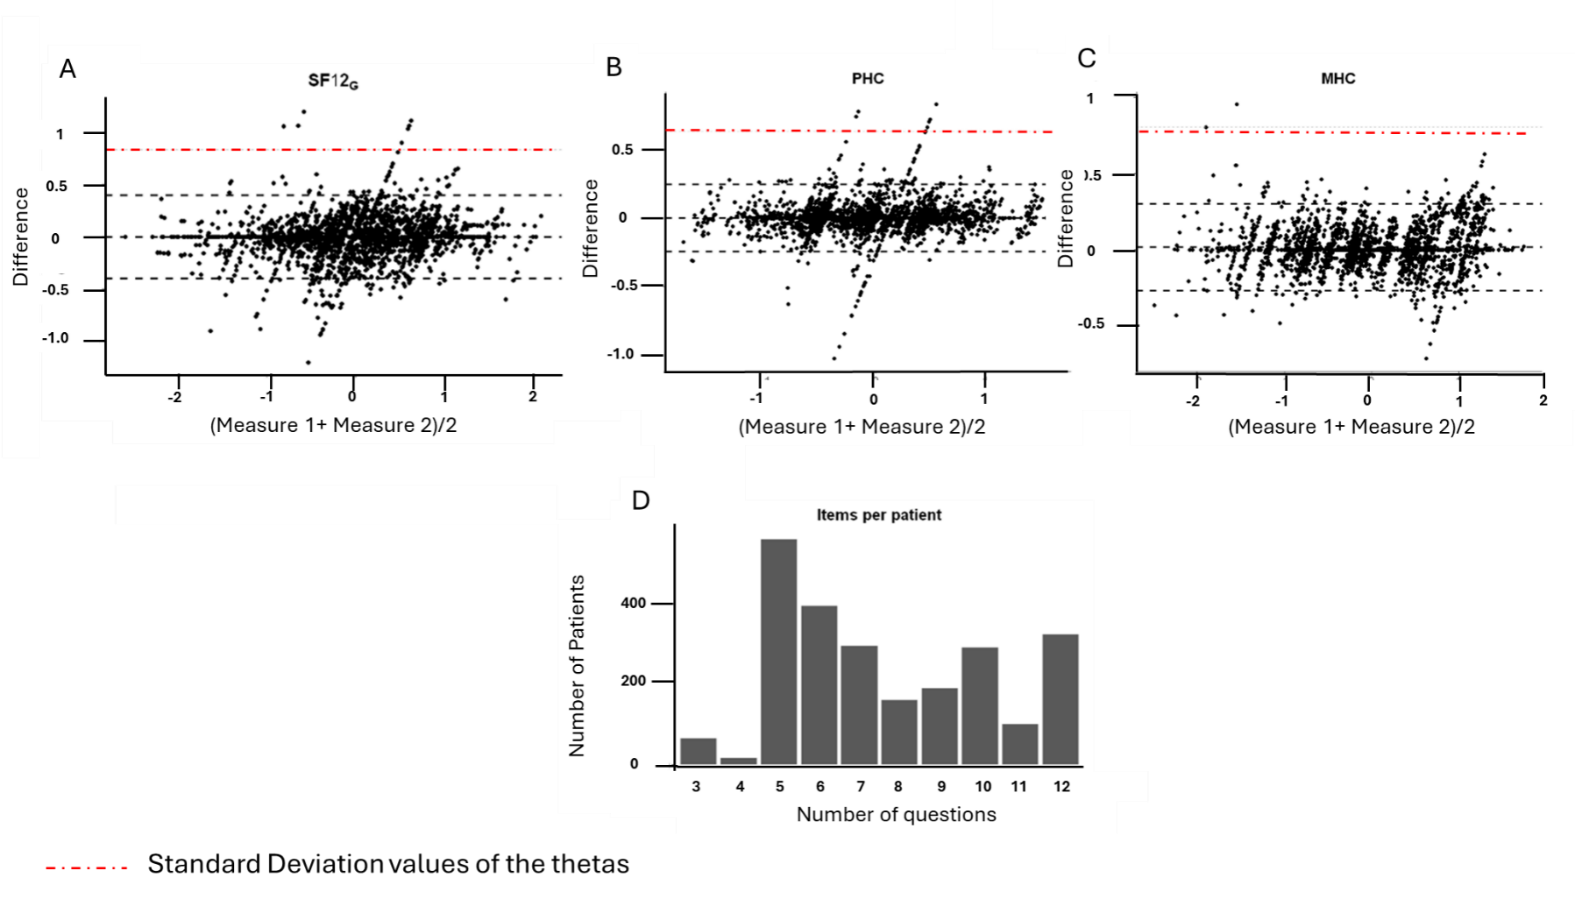
*Figure 1: Agreement between two measurements of SF-12 scores and distribution of item burden***

***Figure 1: Agreement between two measurements of SF-12 scores and distribution of item burden***

*(****A–C****) Bland–Altman plots comparing two administrations/measurements of the same construct (“Measure 1” and “Measure 2”) for three SF-12 outcomes: (****A****) SF12G (General health), (****B****) Physical Health Composite(PHC), and (****C****) Mental Health Composite(MHC). The x-axis shows the average of the pair for each patient, (Measure 1+Measure 2)/2; the y-axis shows the within-patient difference, Measure 1−Measure 2. Each point represents one patient. The solid horizontal line denotes the mean difference (bias). Flanking grey dashed lines depict the limits of agreement (mean difference ± 1.96 SD of the differences). Where shown, a sloped dashed fit illustrates the trend of the difference across the measurement range (assessment of proportional bias). The red dot-dash horizontal reference line marks the standard deviation values of Measure 1, a clinically important difference value for context. Positive values indicate higher scores on Measure 1 than on Measure (****D****) Histogram of questionnaire length per patient used to derive the SF-12 scores. Bars show the number of patients by the count of items completed (3–12 items), illustrating the distribution of response burden in the sample.*

**
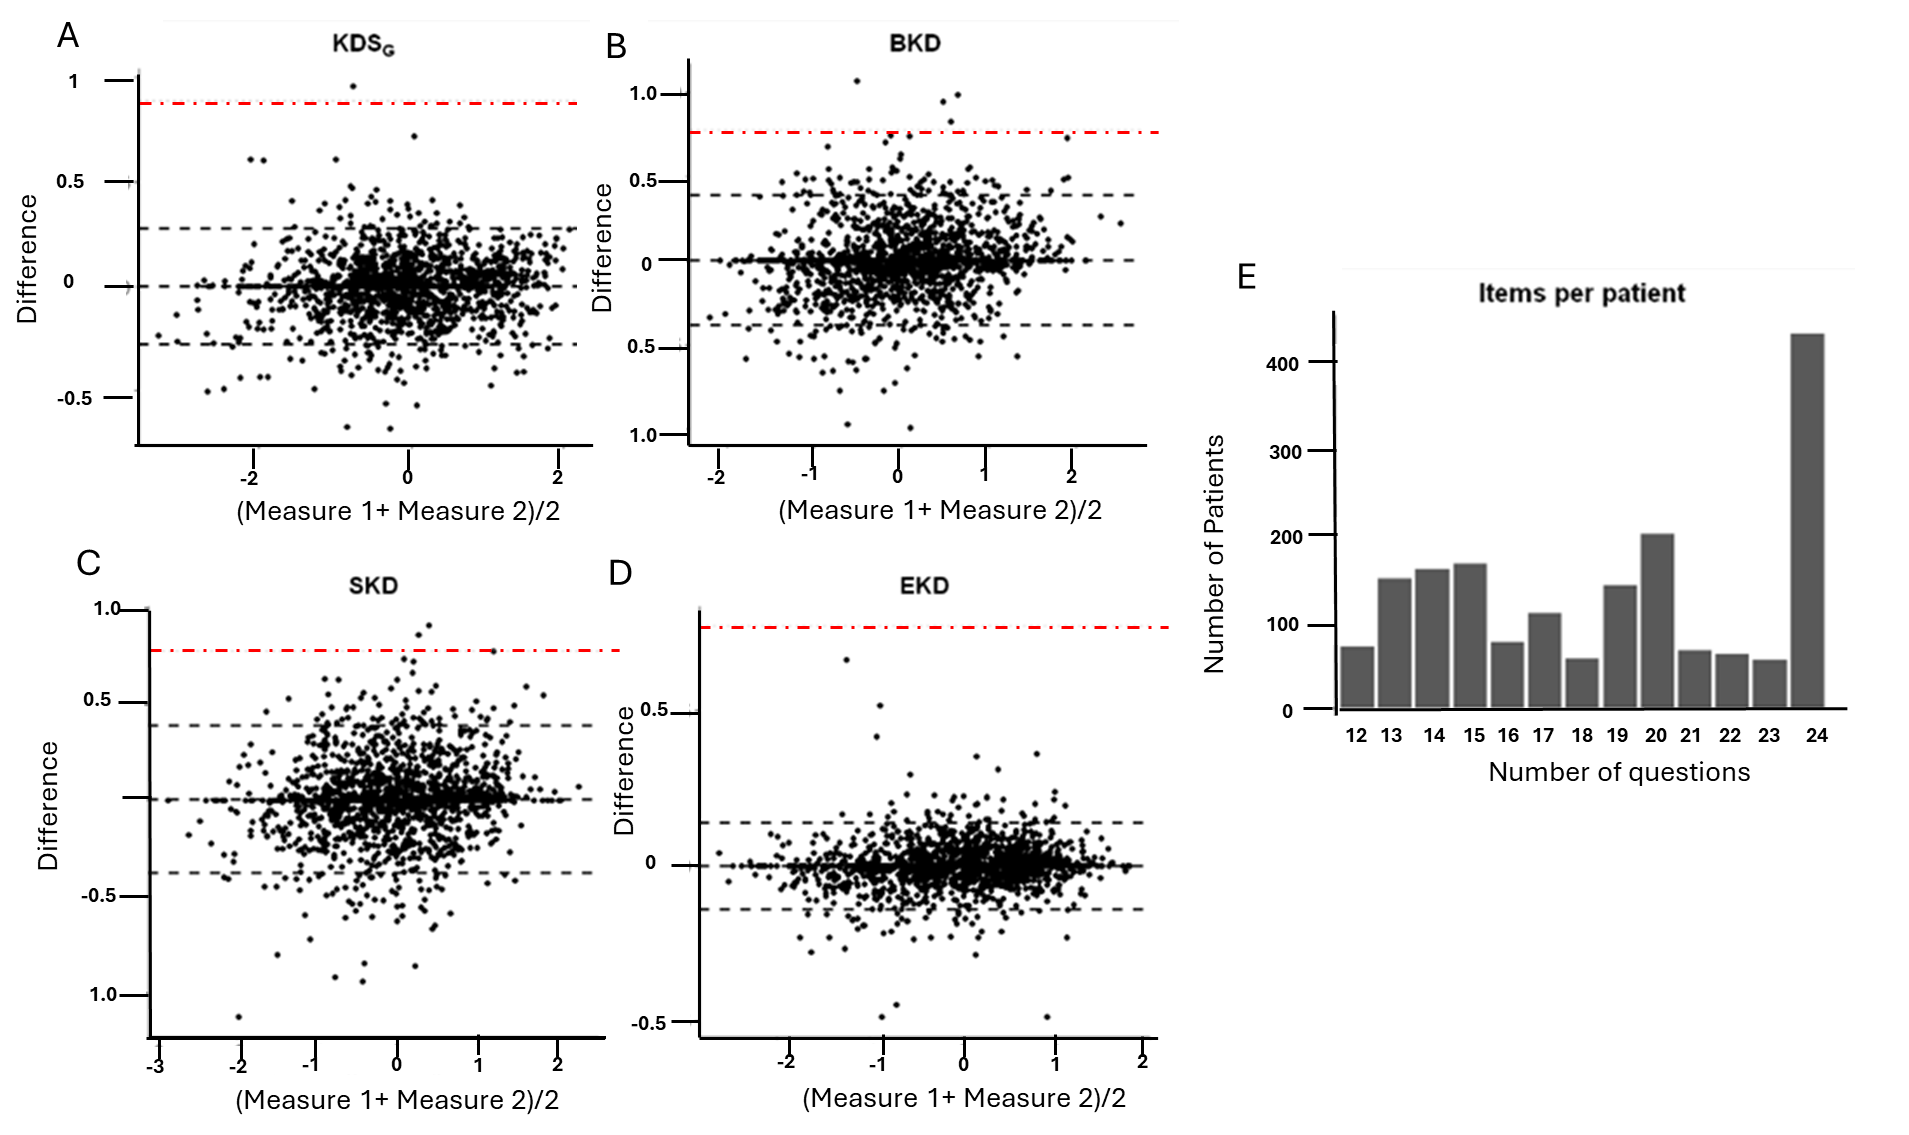
*Figure 2******Agreement between two administrations of the KDQOL-36 kidney-disease–targeted scores, and respondent item burden.***

***Figure 2******Agreement between two administrations of the KDQOL-36 kidney-disease–targeted scores, and respondent item burden.***

*(****A–D****) Bland–Altman plots for paired measurements (“Measure 1” vs “Measure 2”) of the KDQOL-36 disease-specific scales: (****A****) Kidney-disease–specific General score), (****B****) Burden of Kidney Disease(BKD), (****C****) Symptoms of Kidney Disease (SKD), and (****D****) Effects of Kidney Disease (EKD). The x-axis shows the within-patient average (Measure 1+Measure 2)/2; the y-axis shows the within-patient difference (Measure 1−Measure 2). Each dot represents one patient. The solid horizontal line is the mean difference (bias); grey dashed lines indicate the 95% limits of agreement (mean difference ±1.96 SD of the differences). The red dot–dash horizontal line marks a pre-specified reference threshold for a clinically important difference. Positive values indicate higher scores on Measure 1 than on Measure 2.(****E****) Histogram showing the number of disease-specific items completed per patient (range 12–24 items from the KDQOL-36 kidney-disease–targeted sections), illustrating variability in response burden; the tallest bar at 24 items indicates that many patients completed the full set.*
